# Supplementary material for: One-step fabrication of large-area ultrathin MoS2nanofilms with high catalytic activity for photovoltaic devices
Source: Royal Society of Chemistry journal article supplement (doi:10.1039/c6nr03635j), 2016-01-01
Supplement: c6nr03635j1.pdf [file c6nr03635j1.pdf]

# One-step fabrication of large-area ultrathin MoS<sub>2</sub> nanofilms with high catalytic activity for photovoltaic devices

*Jia Liang,<sup>a</sup> Jia Li,<sup>b</sup> Hongfei Zhu,<sup>a</sup> Yuxiang Han,<sup>b</sup> Yanrong Wang,<sup>a</sup> Caixing Wang,<sup>a</sup> Zhong Jin,<sup>a\*</sup>  
Gengmin Zhang,<sup>b\*</sup> and Jie Liu<sup>a,c\*</sup>*

<sup>a</sup> Key Laboratory of Mesoscopic Chemistry of MOE and Collaborative Innovation Center of Chemistry for Life Sciences, School of Chemistry and Chemical Engineering, Nanjing University, Nanjing 210093, China

<sup>b</sup> Key Laboratory for the Physics and Chemistry of Nanodevices, Department of Electronics, Peking University, Beijing 100871, China

<sup>c</sup> Department of Chemistry, Duke University, Durham, North Carolina 27708, USA

\*Corresponding authors.

Email addresses of corresponding authors: [zhongjin@nju.edu.cn](mailto:zhongjin@nju.edu.cn) (Z. Jin); [zgmin@pku.edu.cn](mailto:zgmin@pku.edu.cn) (G. M. Zhang); [j.liu@duke.edu](mailto:j.liu@duke.edu) (J. Liu)

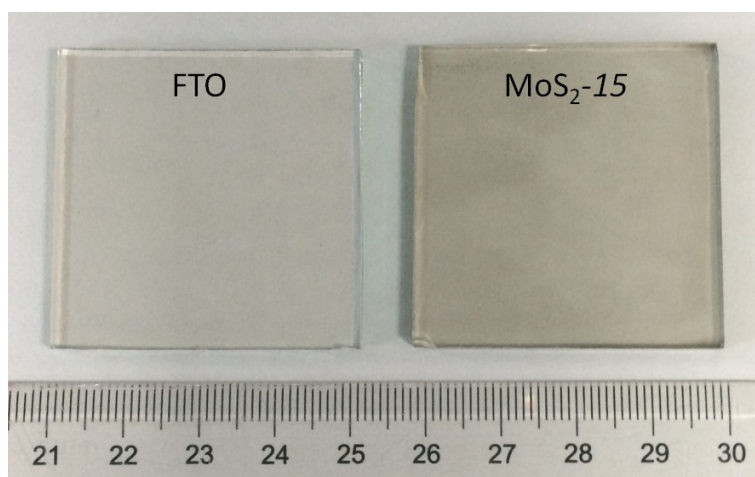

**Figure S1.** Optical photographs of pristine FTO substrate (left) and MoS<sub>2</sub>-15 sample (right) with a large area of 4 cm × 4 cm.

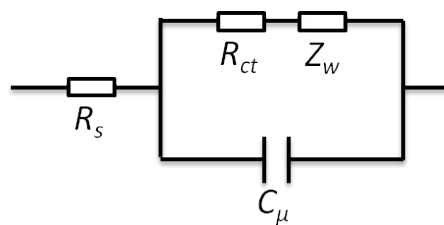

**Figure S2.** Equivalent circuit model of EIS analysis for the DSSCs.

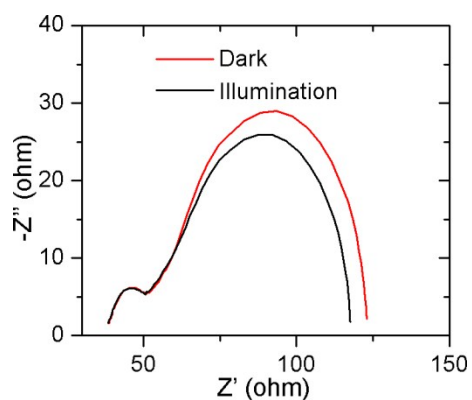

**Figure S3.** Nyquist plots of MoS<sub>2</sub>-15 based DSSC under illumination (black line) and dark condition (red line).

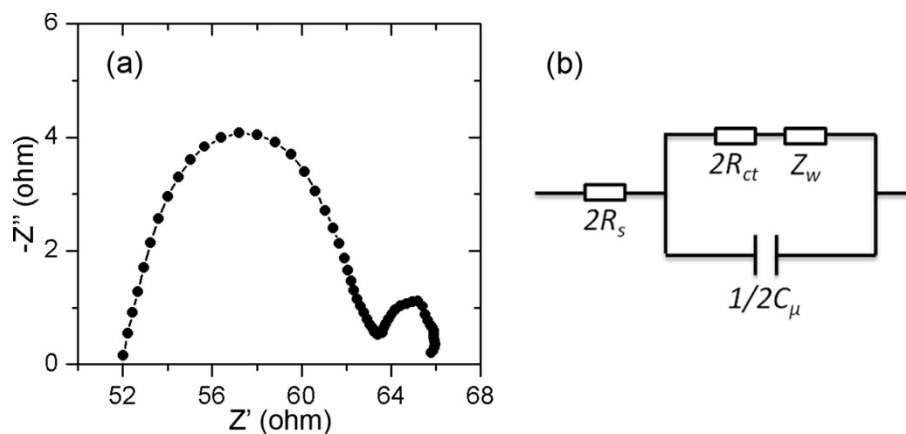

**Figure S4.** (a) Nyquist plot of symmetrical electrochemical cell with the structure of MoS<sub>2</sub>-15/electrolyte/MoS<sub>2</sub>-15. (b) Equivalent circuit model of the symmetrical electrochemical cell.

**Table S1.** EIS parameters of the symmetrical electrochemical cell with a structure of MoS<sub>2</sub>-15/electrolyte/MoS<sub>2</sub>-15.

| Electrodes           | $2R_s/\Omega$ | $2R_{ct}/\Omega$ | $1/2C_\mu/\mu\text{F}$ |
|----------------------|---------------|------------------|------------------------|
| MoS <sub>2</sub> -15 | 52.5          | 10.1             | 16.1                   |

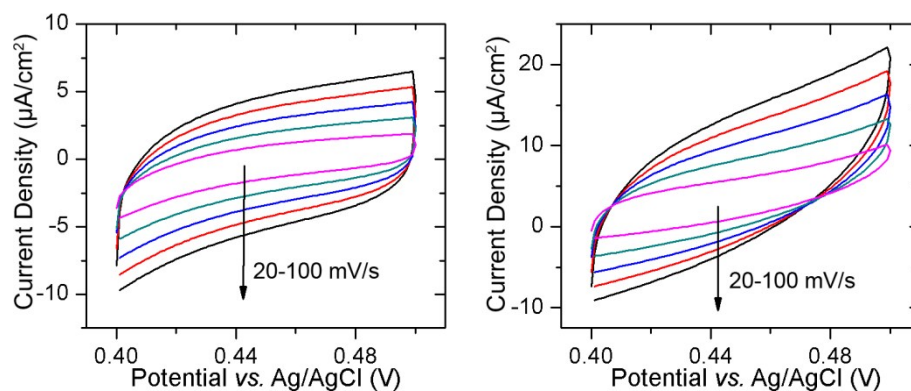

**Figure S5.** CV curves of (a) Pt and (b) MoS<sub>2</sub>-15 based counter electrodes taken in a selected potential range without Faradaic current under different scanning rates (20, 40, 60, 80, and 100 mV/s), respectively.

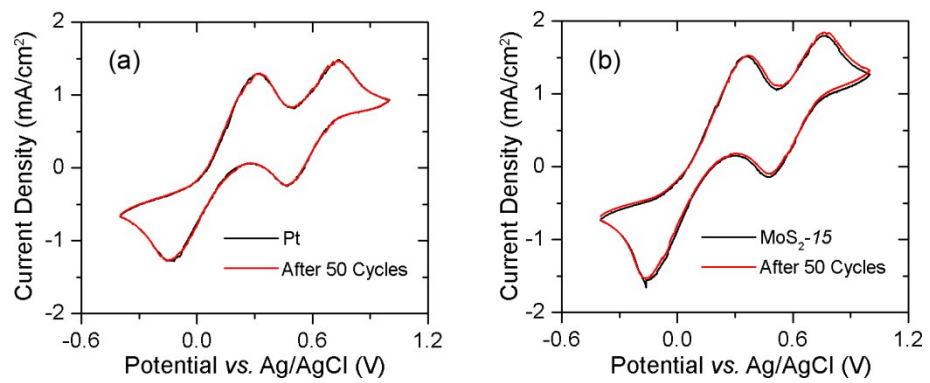

**Figure S6.** CV curves of (a) Pt and (b) MoS<sub>2</sub>-15 based counter electrodes before and after 50 cycles with a scanning rate of 100 mV/s, respectively.
